# Supplementary material
Source: publisher site journal article supplement (https://www.kjim.org/upload/media/kjim-2022-072-suppl12.pdf)
Supplement: Supplementary file 1 [file kjim-2022-072-suppl12.pdf]

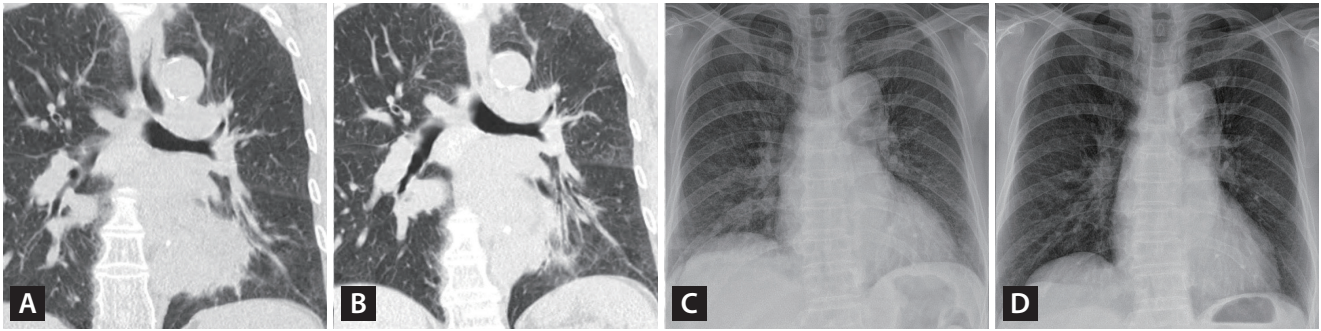

**Supplementary Figure 8.** Radiologic findings of patient #9 before and after coronavirus disease 2019 (COVID-19) vaccination (second dose of BNT162b2-mRNA vaccine). (A) Seven months prior to onset. (B, C) COVID-19 vaccine-related pneumonitis (CV-P). (D) Four months after CV-P.
